# Supplementary material for: Biased IL-2 signals induce Foxp3-rich pulmonary lymphoid structures and facilitate long-term lung allograft acceptance in mice
Source: Nat Commun. 2023 Mar 13;14:1383. doi: 10.1038/s41467-023-36924-z (PMC10011523; doi:10.1038/s41467-023-36924-z)
Supplement: Supplementary file 1 — Supplementary Information [file 41467_2023_36924_MOESM1_ESM.pdf]

## **Supplementary Information to**

### **Biased IL-2 signals induce Foxp3-rich pulmonary lymphoid structures and facilitate long-term lung allograft acceptance in mice**

Yoshito Yamada, Tuan Thanh Nguyen, Daniela Impellizzieri, Katsutaka Mineura, Rintaro Shibuya, Alvaro Gomariz, Martina Haberecker, Jakob Nilsson, César Nombela-Arrieta, Wolfgang Jungraithmayr, and Onur Boyman

#### **This Supplementary Information file contains:**

Supplementary Fig. 1. Flow cytometry gating strategies.

Supplementary Fig. 2. Dynamics of B cells and T cell subsets in secondary lymphoid organs following treatment and lung transplantation.

Supplementary Fig. 3. Localization of T cell subsets in allografted lungs.

Supplementary Fig. 4. Localization of B and CD11c<sup>+</sup> cells in allografted lungs.

Supplementary Fig. 5. Spatial distribution of immune cell subsets in allografted lungs.

Supplementary Fig. 6. Cumulative distribution function of immune cell subsets.

Supplementary Fig. 7. Analysis of T cell neighbors in allografted lungs.

Supplementary Fig. 8. Peripheral node addressin staining.

Supplementary Fig. 9. Use of diphtheria toxin in IL-2cx-treated wild-type mice.

Supplementary Fig. 10. Representative histological examples illustrating scoring.

Supplementary Table 1. Antibodies used for flow cytometry.

Supplementary Table 2. Antibodies used for immunofluorescence staining.

**a** PBS day 15 - grafted lung

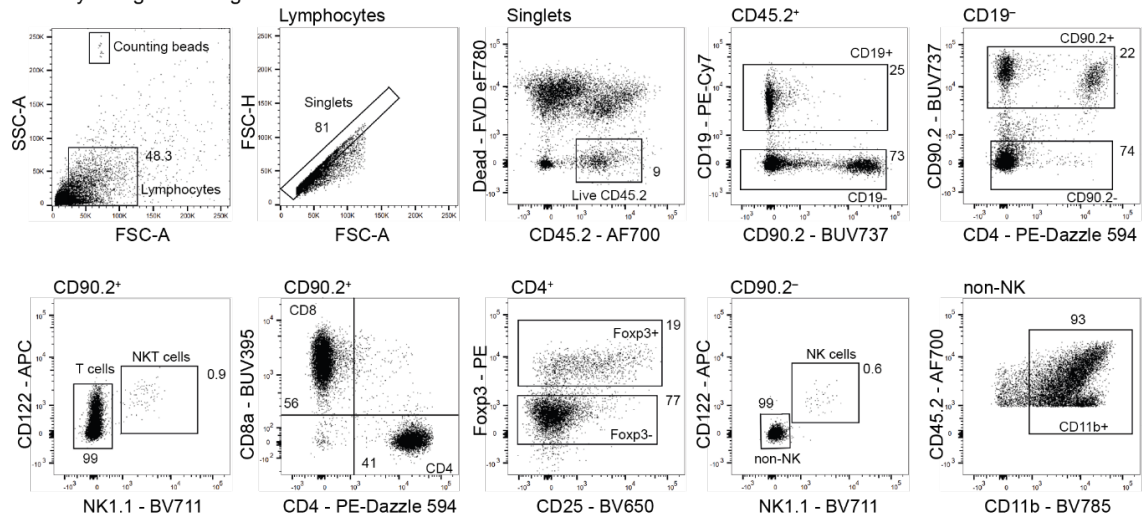

**b** IL-2cx day 15 - grafted lung

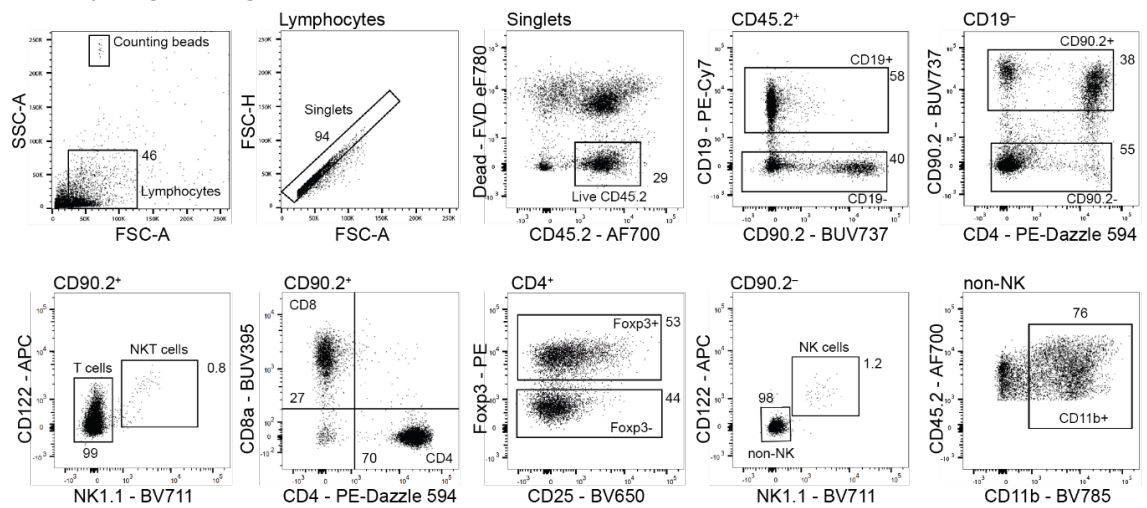

**Supplementary Fig. 1. Flow cytometry gating strategies.** (a, b) Representative gating strategy of indicated immune cell subsets in lung tissues of PBS- (a) and IL-2cx-treated mice (b), analyzed on day 15 after transplantation.

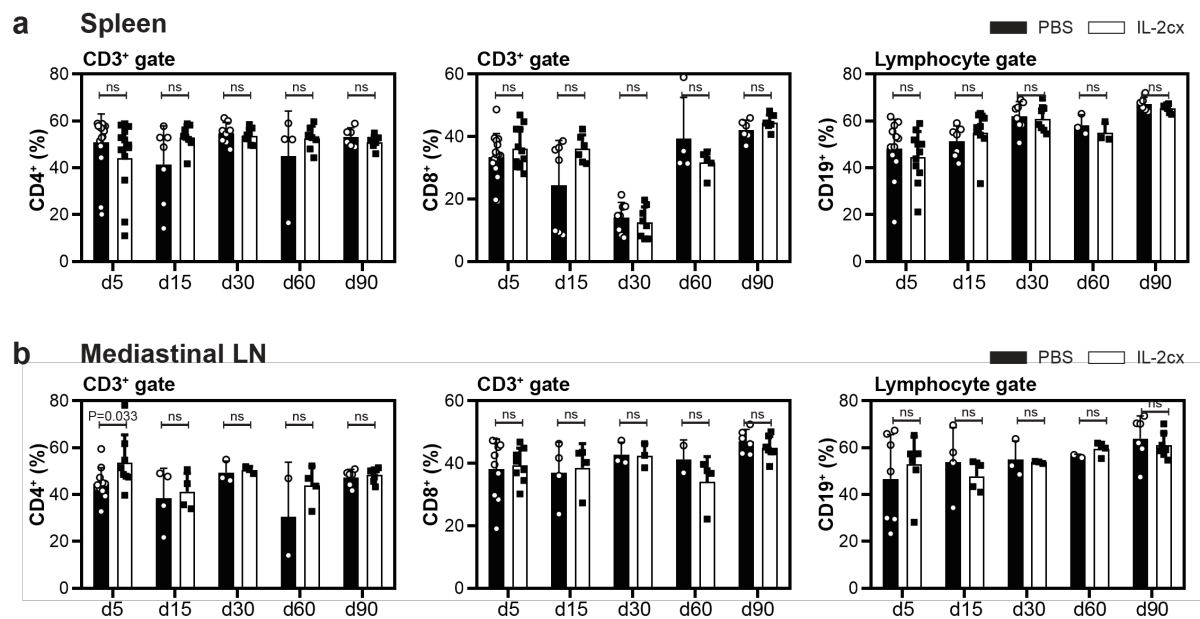

**Supplementary Fig. 2. Dynamics of B cells and T cell subsets in secondary lymphoid organs following treatment and lung transplantation. (a, b)** Bars represent percentages of indicated T cell subsets in spleen **(a)** and mediastinal lymph nodes (LN) **(b)** of PBS- (open circles and black filled bars) and IL-2cx-treated mice (filled squares and open bars). Analysis was performed on indicated days after transplantation. Each symbol represents an individual mouse. Data are shown as mean  $\pm$  SD of  $n \geq 4$  of 3–7 independent experiments (exact number provided in Source Data file). Significance of differences between groups was calculated using two-sided Mann-Whitney U test with calculated  $p$  values shown. ns, not significant.

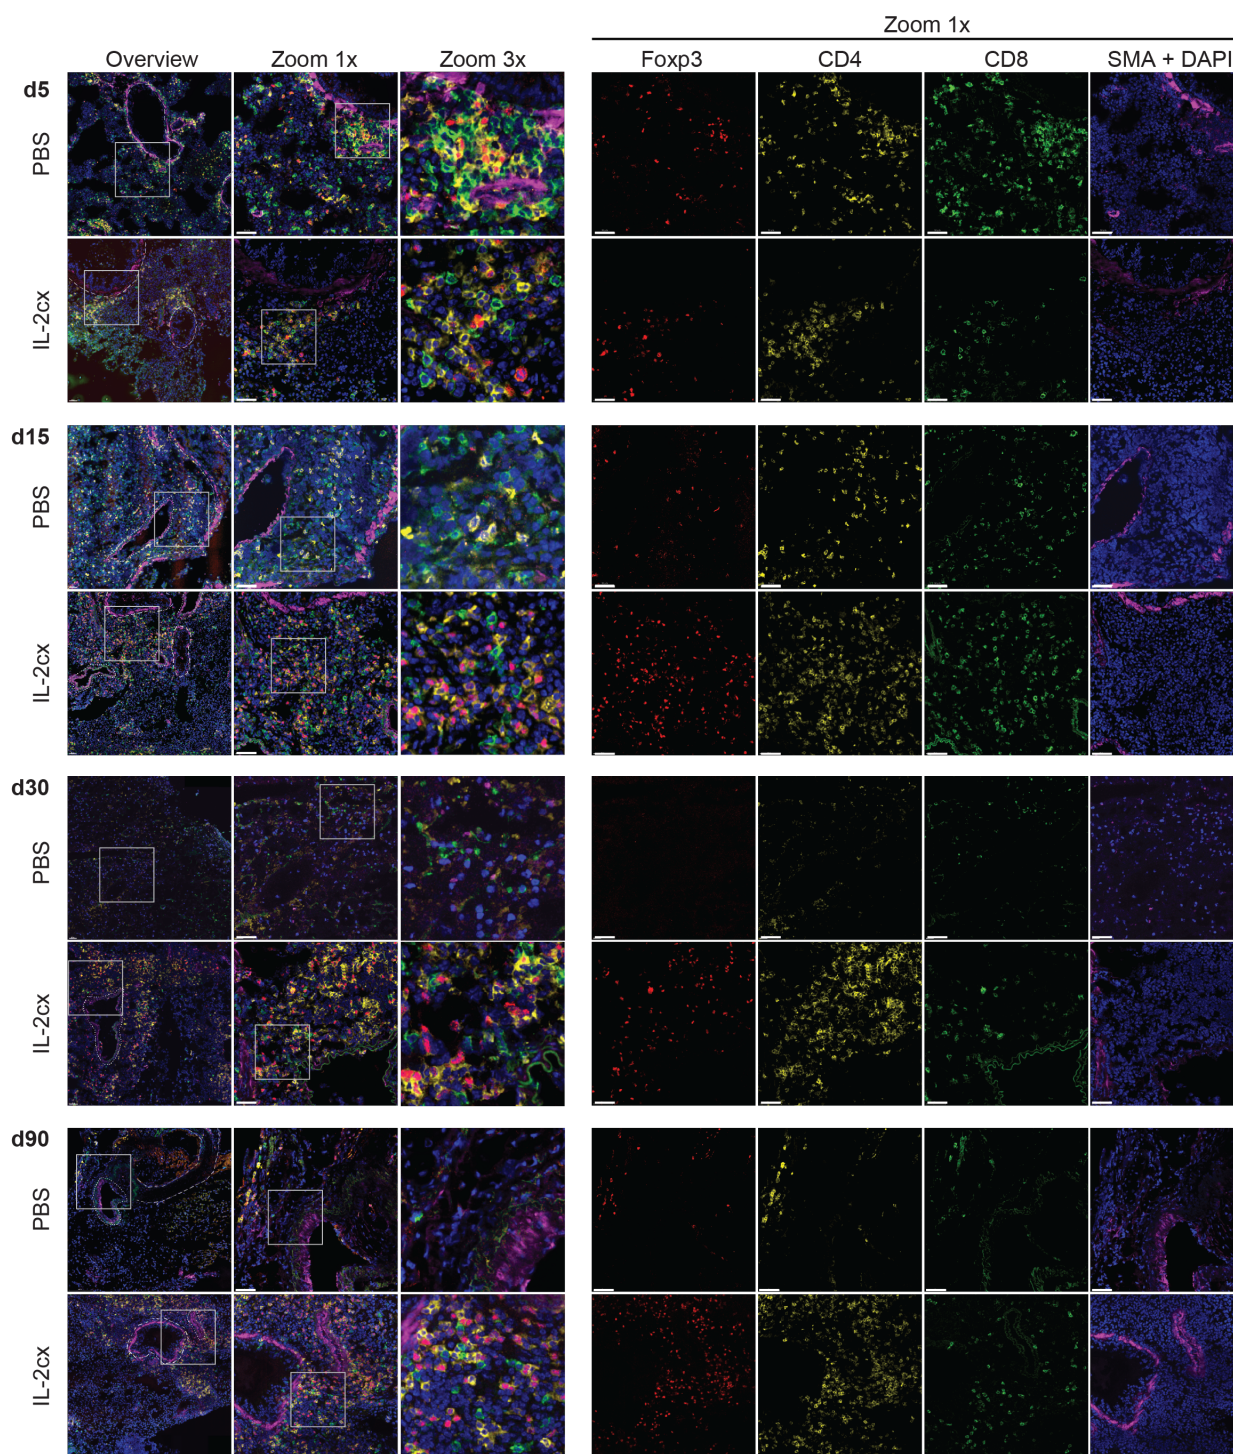

**Supplementary Fig. 3. Localization of T cell subsets in allografted lungs.** BALB/c lungs were transplanted as in Fig. 1a into C57BL/6 recipients pre-treated as indicated. Immunofluorescence staining for Foxp3 (red), CD4 (yellow), CD8 (green),  $\alpha$ -smooth muscle actin (SMA; purple), and nuclei by 4',6-diamidino-2-phenylindole (DAPI; blue) in grafted lungs of PBS- (top panels) and IL-2cx-treated mice (bottom panels). Lungs were harvested on indicated days after transplantation. Squares indicate areas of zoom-ins. Scale bars = 50  $\mu$ m.

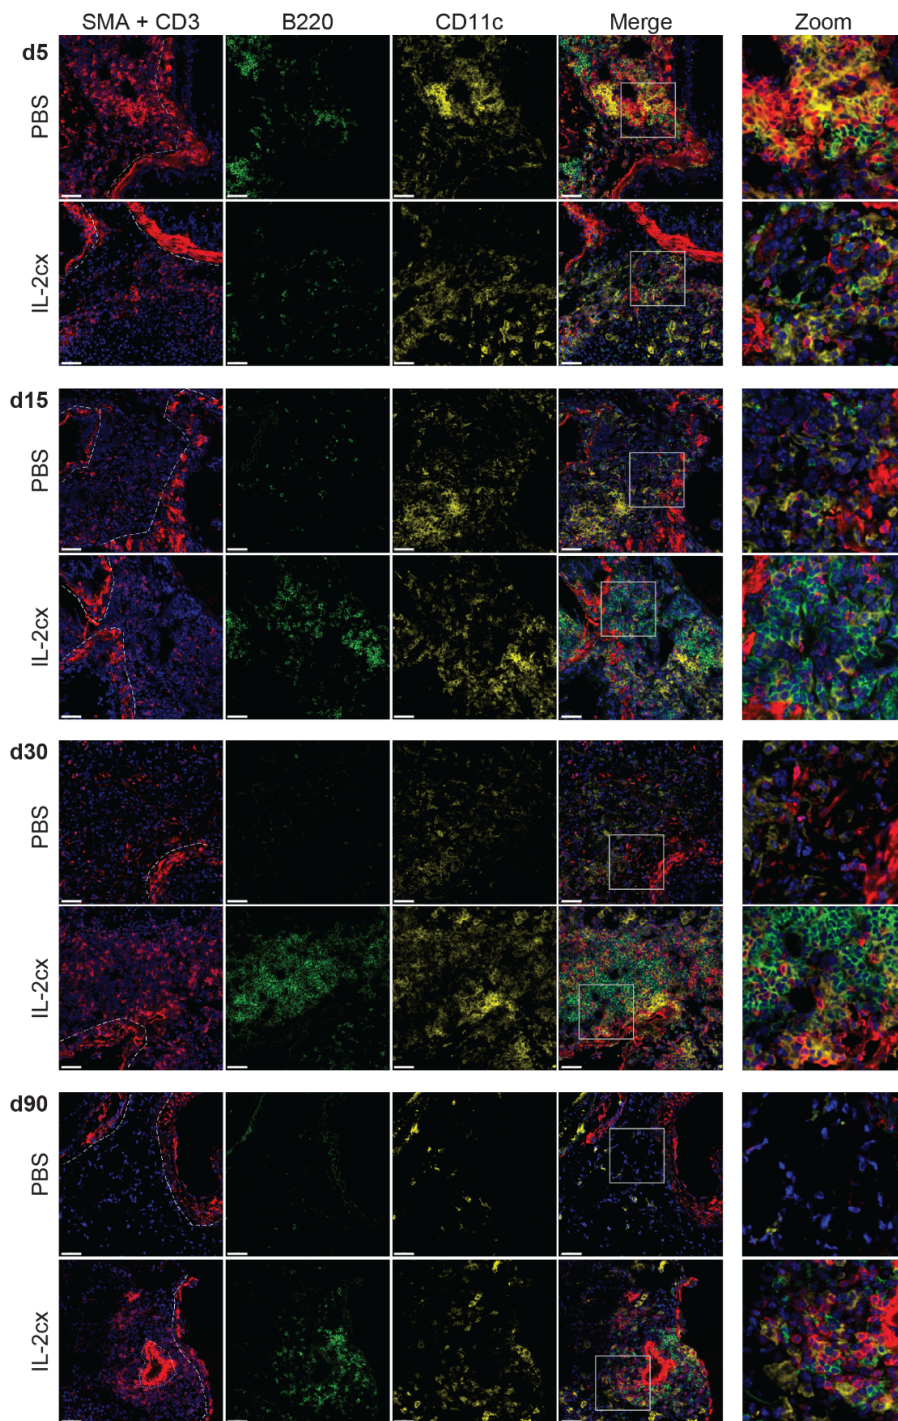

**Supplementary Fig. 4. Localization of B and CD11c<sup>+</sup> cells in allografted lungs.** BALB/c lungs were transplanted as in Fig. 1a into C57BL/6 recipients pre-treated as indicated. Immunofluorescence staining for SMA and CD3 (red), B220 (green), CD11c (yellow), and nuclei (DAPI; blue) in grafted lungs of PBS- (top panels) and IL-2cx-treated mice (bottom panels). Lungs were harvested on indicated days after transplantation. Squares indicate areas of 3X zoom. Scale bars = 50 μm.

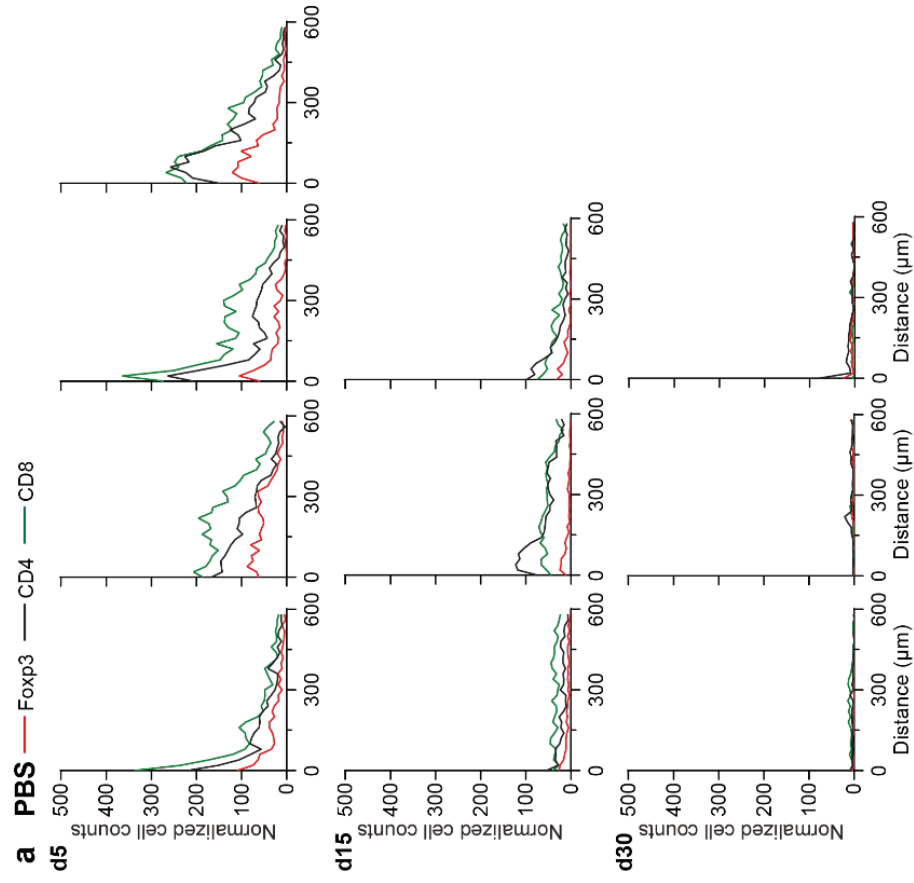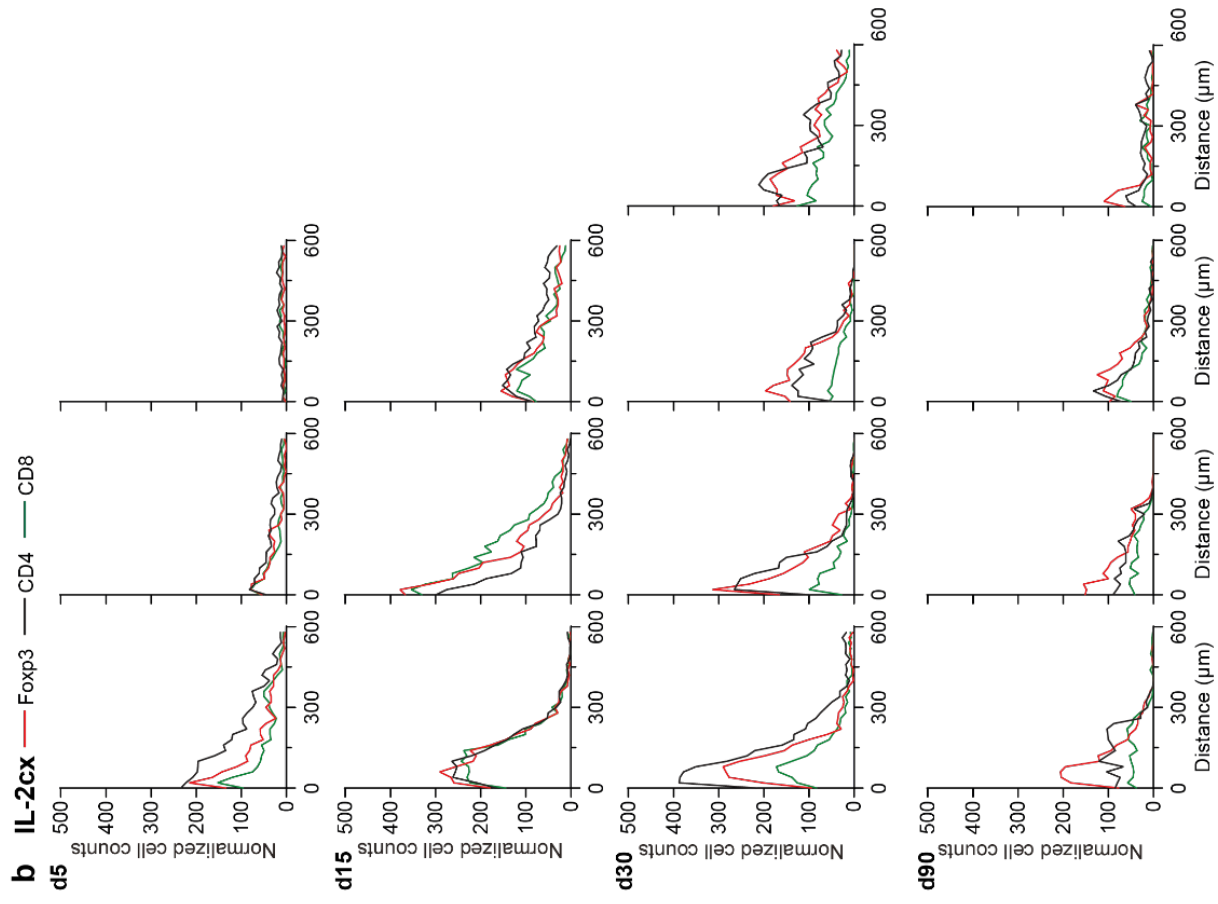

**Supplementary Fig. 5. Spatial distribution of immune cell subsets in allografted lungs.**

BALB/c lungs were transplanted as in Fig. 1a into C57BL/6 recipients pre-treated as indicated. **(a, b)** Distance of Foxp3<sup>+</sup> T (red lines), Foxp3<sup>-</sup> conventional CD4<sup>+</sup> T (black lines), and CD8<sup>+</sup> T cells (green lines) from nearest SMA<sup>+</sup> bronchus based on immunofluorescence analysis in grafted lungs of individual PBS- **(a)** and IL-2cx-treated mice **(b)** on indicated days after transplantation.

## a Cumulative distribution function (CDF)

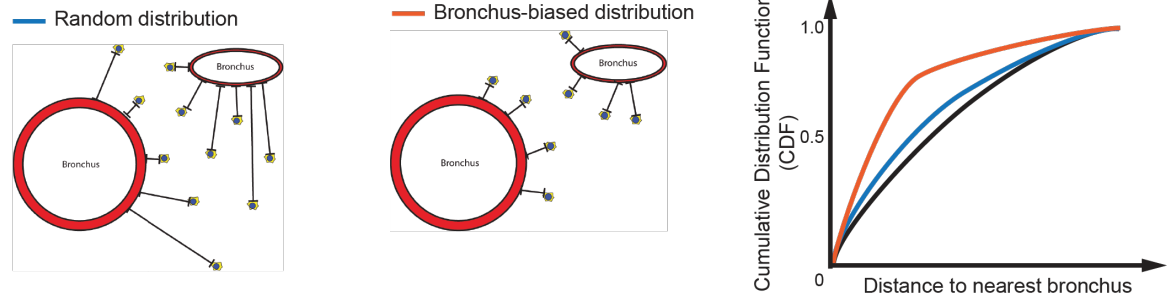

## b CDF of distance to nearest SMA<sup>+</sup> Bronchus

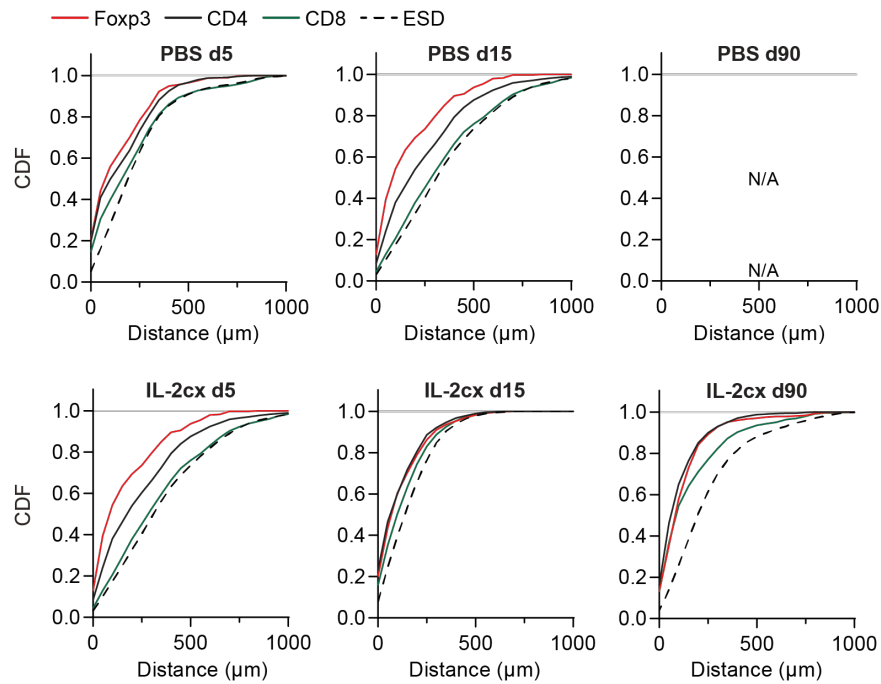

## c CDF of distance to nearest SMA<sup>+</sup> Bronchus

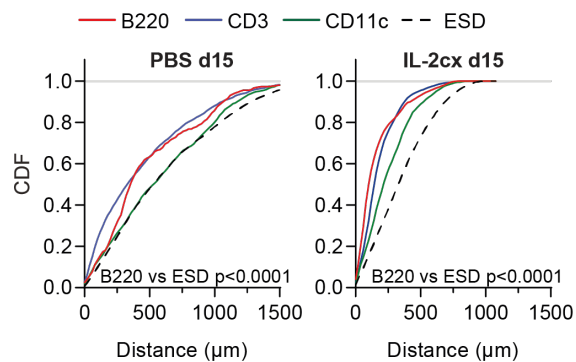

**Supplementary Fig. 6. Cumulative distribution function of immune cell subsets. (a)**

Graphical representation of the cumulative distribution function (CDF) calculating the distance of indicated immune cell subsets to the nearest bronchus in allografted lungs. The two examples illustrate cells randomly distributed around a bronchus (left panel) or cells distributed in proximity to a bronchus (middle panel). These two examples of CDF are represented in the right panel by a blue line for random distribution and an orange line for bronchus-biased distribution. The black line indicates empty space distribution (ESD) and represents random cell distribution. A shift of the CDF away from ESD indicates a bronchus-biased distribution. **(b)** CDFs of Foxp3<sup>+</sup>CD4<sup>+</sup> Treg (Foxp3; red lines), Foxp3<sup>-</sup> conventional CD4<sup>+</sup> T (CD4; black lines), and CD8<sup>+</sup> T cells (CD8; green lines) were calculated based on immunofluorescence staining in allografted lungs of PBS- and IL-2cx-treated mice on days 5, 15 and 90 after transplantation. **(c)** CDFs of B220<sup>+</sup> B (red lines), CD3<sup>+</sup> T (blue lines), and CD11c<sup>+</sup> myeloid cells (green lines) were analyzed and calculated as described in **b**.

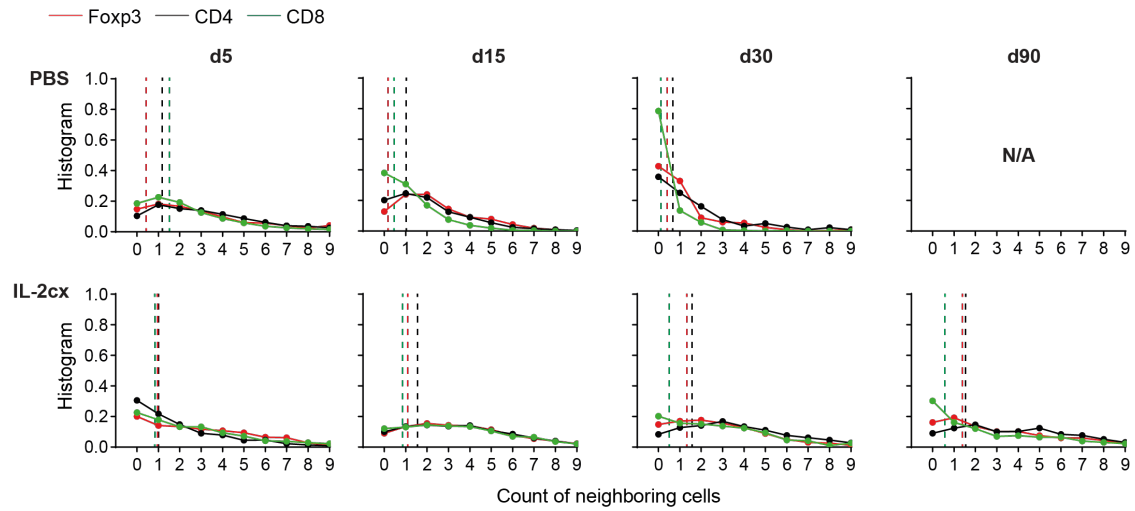

**Supplementary Fig. 7. Analysis of T cell neighbors in allografted lungs.** BALB/c lungs were transplanted as in Fig. 1a into C57BL/6 recipients pre-treated as indicated. Cells neighboring T cell subsets were quantified in indicated conditions and at indicated timepoints, with CD4<sup>+</sup>Fcpx3<sup>+</sup> Treg cells represented as red dots and lines, CD4<sup>+</sup>Fcpx3<sup>-</sup> T cells as black dots and lines, and CD8<sup>+</sup> T cells as green dots and lines. Dashed and colored vertical lines represent the mean counts of neighboring cells.

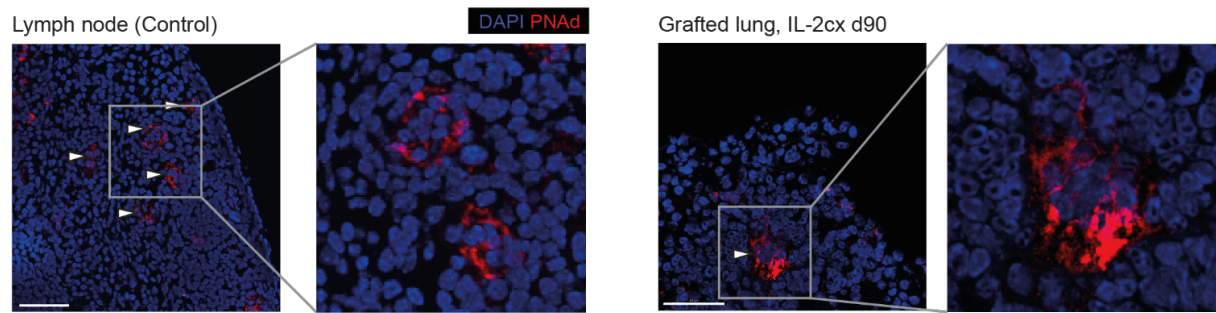

**Supplementary Fig. 8. Peripheral node addressin staining.** Immunofluorescence staining for peripheral node addressin (PNAd; red) and nuclei (DAPI; blue) in a lymph node of an untreated C57BL/6 WT control (left) and in a grafted lung of an IL-2cx-treated mouse (right) on day 90 after transplantation. White arrow heads indicate PNAd<sup>+</sup> cells. Scale bars = 150  $\mu$ m. Representative images of n = 3 mice of 2 independent experiments.

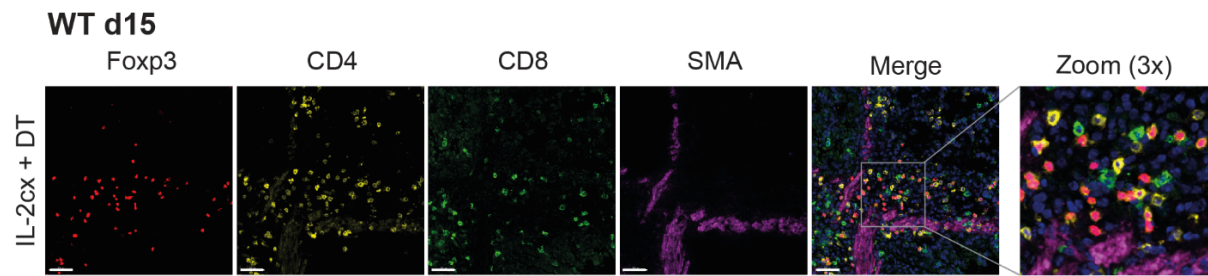

**Supplementary Fig. 9. Use of diphtheria toxin in IL-2cx-treated wild-type mice.** BALB/c lungs were transplanted as in Fig. 1a into IL-2cx-treated C57BL/6 wild-type recipient mice, which additionally received diphtheria toxin (DT) every second day. Shown are immunofluorescence staining for Foxp3 (red), CD4 (yellow), CD8 (green), SMA (purple), and nuclei (DAPI; blue) in allografted lungs from C57BL/6 wild-type mice treated with IL-2cx + DT. Analysis was performed on day 15 after transplantation. Square indicates area of 3X zoom. Scale bars = 50  $\mu$ m. Representative images of n = 3 mice of 2 independent experiments.

**a Exemplary histology samples for ISHLT A score**

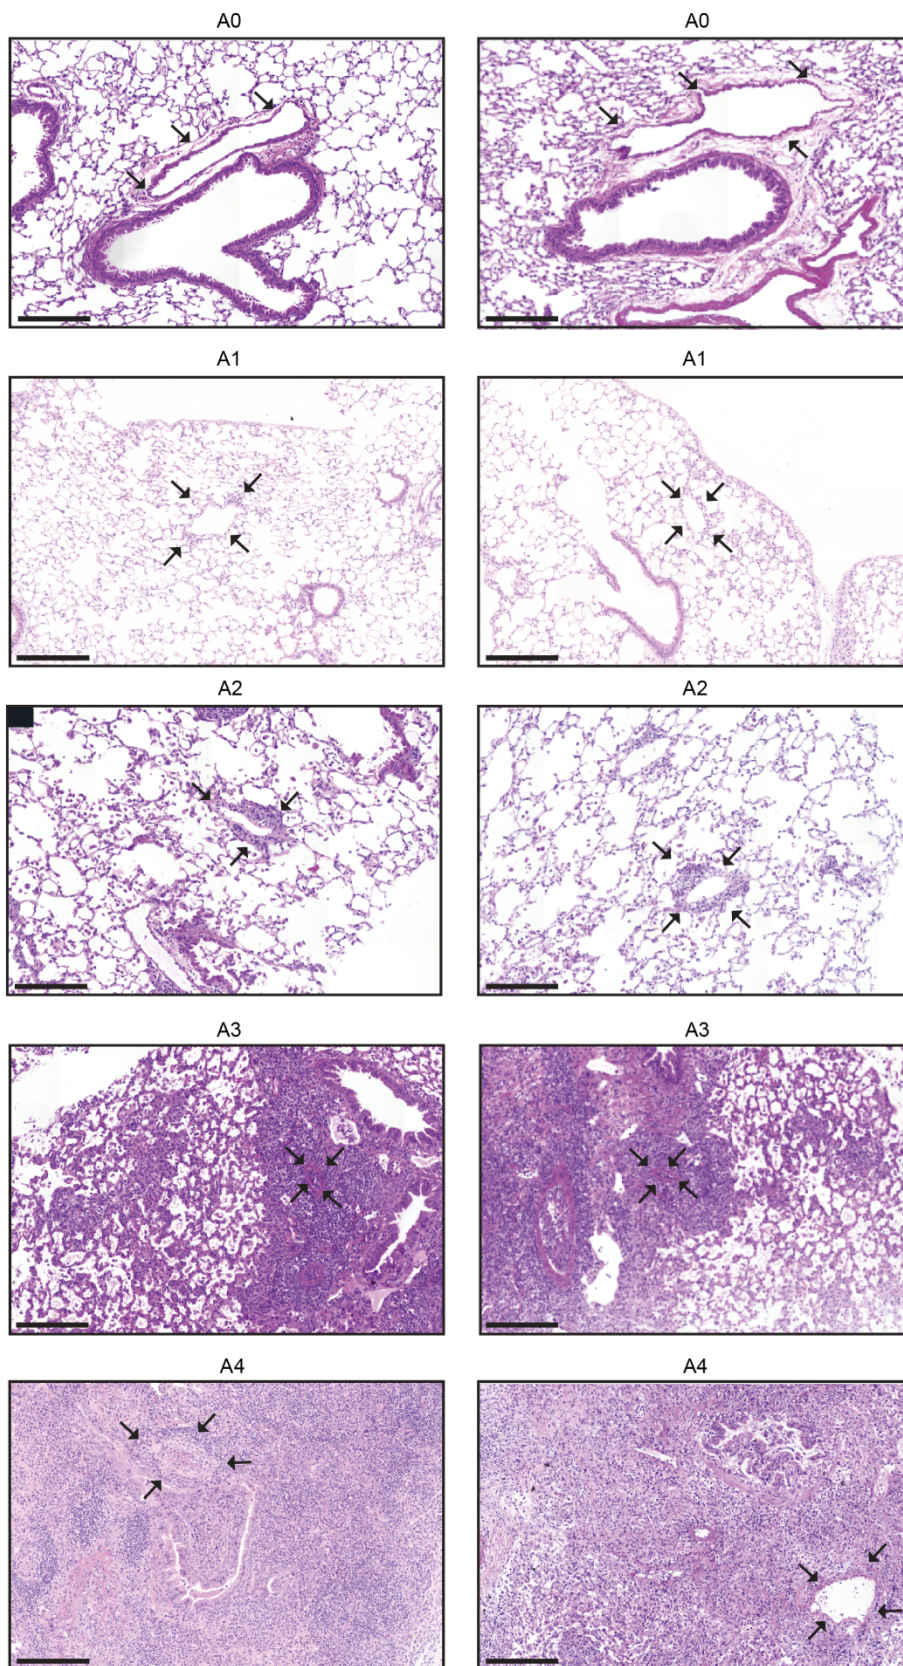

**b Exemplary histology samples for ISHLT B score**

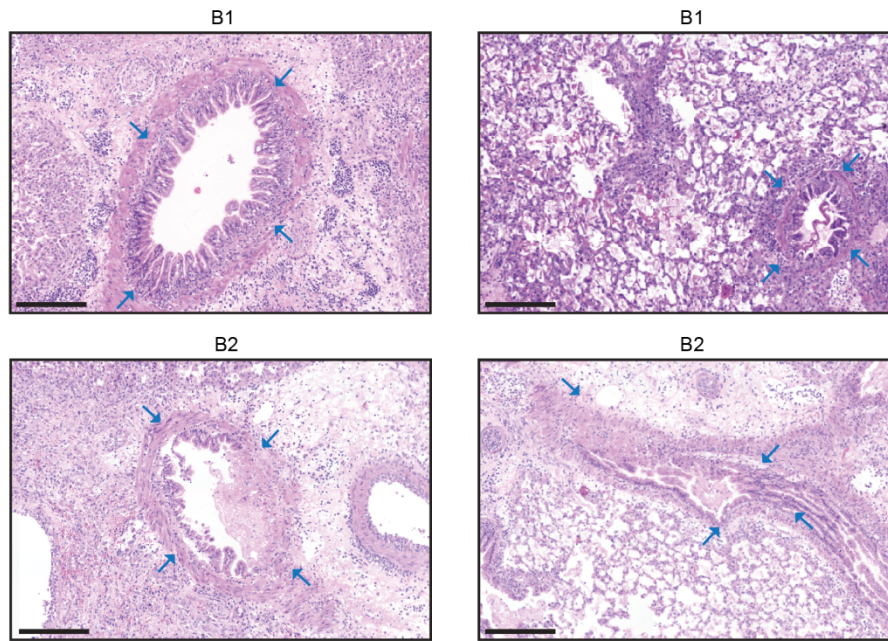

**c Exemplary histology samples for ISHLT C score**

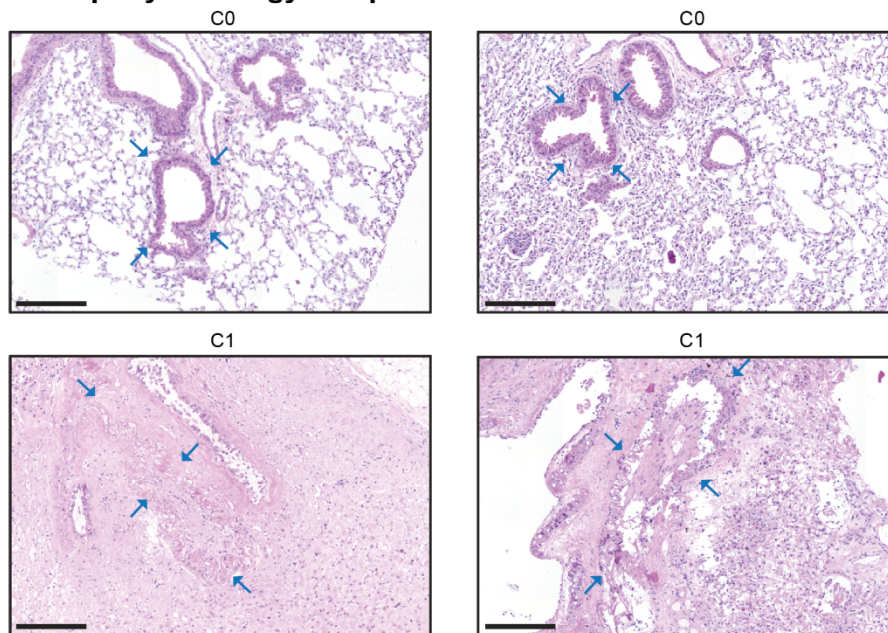

**d Exemplary histology samples for fibrosis and infarction**

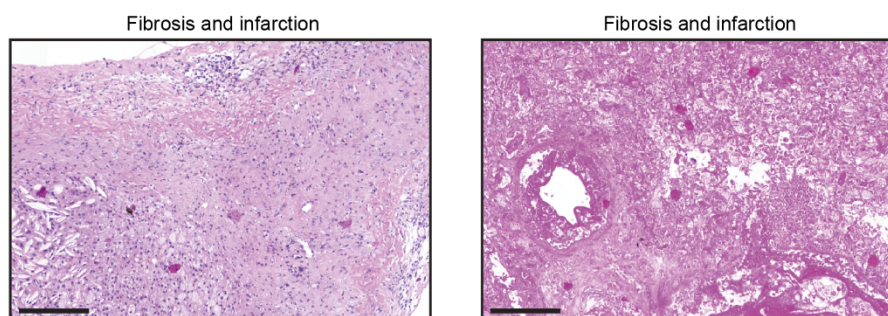

**Supplementary Fig. 10. Representative histological examples illustrating scoring.** An adapted International Society for Heart and Lung Transplantation (ISHLT) scoring was used to quantify allograft rejection, including ISHLT grade A (acute rejection), grade B (airway inflammation), and grade C (chronic airway rejection) scoring. **(a)** Using ISHLT grade A, acute rejection was scored as follows. A0, no evidence of acute rejection. A1, presence of sparse lymphocyte layers around blood vessels that are not visible on low magnification. A2, prominent perivascular lymphocytic infiltrates that are easily recognizable on low magnification. A3, extension of perivascular lymphocytic infiltrates into adjacent alveolar septa. A4, diffuse perivascular, interstitial and alveolar inflammation and necrotizing vasculitis. **(b)** ISHLT grade B differentiated the following features of airway inflammation. B0, no evidence of airway inflammation. B1, lymphocytes in walls of small airways without epithelial damage. B2, significant numbers of lymphocytes in walls of small airways, extending into bronchiolar walls, intraepithelial lymphocytosis, and ulceration of airway walls. **(c)** ISHLT grade C served to quantify chronic airway rejection. C0, no evidence of chronic airway rejection. C1, connective tissue completely obliterates the lumen of an airway. **(d)** Exemplary hematoxylin and eosin staining showing allografted lung tissue with advanced fibrosis and infarction (abbreviated as F/I in scores) due to allograft rejection. Black arrows indicate blood vessels and blue arrows indicate airways. Scale bars = 200  $\mu$ m. Representative images of  $n \geq 6$  mice of 2–3 independent experiments.

**Supplementary Table 1. Antibodies used for flow cytometry.**

| <b>Target</b> | <b>Fluorophore</b> | <b>Clone</b> | <b>Dilution</b> | <b>Provider, catalog number</b> |
|---------------|--------------------|--------------|-----------------|---------------------------------|
| CD3e          | PerCP-Cy5.5        | 145-2C11     | 1:200           | Biolegend, #100218              |
| CD3e          | BV605              | 145-2C11     | 1:200           | Biolegend, #100237              |
| CD4           | V450               | GK1.5        | 1:400           | Thermo Fisher, #560468          |
| CD4           | PE-Dazzle-594      | GK1.5        | 1:600           | Biolegend, #100565              |
| CD8a          | BUV395             | 53-6.7       | 1:200           | BD Biosciences, #563786         |
| CD11b         | BV785              | M1/70        | 1:600           | Biolegend, #101243              |
| CD19          | BV510              | 6D5          | 1:400           | Biolegend, #115546              |
| CD19          | PE-Cy7             | 6D5          | 1:400           | Biolegend, #115509              |
| CD25          | APC                | PC61         | 1:200           | Biolegend, #102012              |
| CD25          | BV650              | PC61         | 1:400           | Biolegend, #102038              |
| CD45.2        | FITC               | 104          | 1:200           | Biolegend, #109806              |
| CD45.2        | AF700              | 104          | 1:400           | Biolegend, #109822              |
| CD90.2        | BUV737             | 53-2.1       | 1:400           | BD Biosciences, # 741701        |
| CD122         | APC                | TMB1         | 1:200           | Biolegend, #123214              |
| Foxp3         | PE                 | FJK-16s      | 1:200           | Thermo Fisher, #12-5773-82      |
| Foxp3         | AF488              | FJK-16s      | 1:200           | Thermo Fisher, #53-5773-82      |
| Ki-67         | BV421              | B56          | 1:200           | BD Biosciences, #562899         |
| NK1.1         | AF700              | PK136        | 1:200           | Biolegend, #108730              |
| NK1.1         | BV711              | PK136        | 1:200           | Biolegend, #108745              |
| Live/Dead     | eFlour 780         |              | 1:1000          | Thermo Fisher, # 65-0865-14     |

**Supplementary Table 2. Antibodies used for immunofluorescence staining.**

| <b>Target</b> | <b>Fluorophore</b> | <b>Clone</b> | <b>Dilution</b> | <b>Provider, catalog number</b> |
|---------------|--------------------|--------------|-----------------|---------------------------------|
| B220          | Alexa 488          | RA3-6B2      | 1:100           | Biolegend, #103225              |
| CD3e          | Alexa 647          | 145-2C11     | 1:100           | Biolegend, #100322              |
| CD4           | Alexa 594          | GK1.5        | 1:100           | Biolegend, #100446              |
| CD8a          | Alexa 488          | 53-6.7       | 1:100           | Biolegend, #100723              |
| CD11c         | Alexa 594          | N418         | 1:200           | Biolegend, #117346              |
| Foxp3         | eFluor 570         | FJK-16s      | 1:100           | Thermo Fisher, #41-5773-82      |
| PNAd          | Alexa 647          | MECA-79      | 1:200           | Biolegend, #120808              |
| SMA           | eFlour660          | 1A4          | 1:300           | Thermo Fisher, 50-9760-82       |
